# Supplementary material
Source: publisher figshare collection journal article supplement (https://future-science-group.figshare.com/ndownloader/files/34444856)
Supplement: Supplementary file 1 [file 34444856]

Table S3. The amount of data and genome coverage of NDV at different sequencing times

| **Sequencing time** | **Read counts** | **Total bases (bp)** | **Average Coverage** | **The percentage of NDV genome with 1X coverage (%)** | **The percentage of NDV genome with 10X coverage (%)** | **The percentage of NDV genome with 100X coverage (%)** | **The percentage of NDV genome with 1000X coverage (%)** |
| --- | --- | --- | --- | --- | --- | --- | --- |
| 1min | 591 | 649,004 | 41.3 | 100 | 87.9 | 7.8 | 0 |
| 2min | 2,843 | 2,904,018 | 184.6 | 100 | 93.4 | 66.2 | 0 |
| 3min | 6,960 | 7,440,383 | 472.8 | 100 | 100 | 88.9 | 9.6 |
| 4min | 12,645 | 13,827,207 | 878.9 | 100 | 100 | 93.3 | 37.4 |
| 5min | 18,378 | 20,241,687 | 1,286.7 | 100 | 100 | 93.3 | 64.6 |
| 6min | 24,108 | 26,674,850 | 1,696.0 | 100 | 100 | 97.7 | 65.4 |
| 7min | 29,846 | 33,114,342 | 2,105.5 | 100 | 100 | 99.9 | 72.8 |
| 8min | 35,623 | 39,569,719 | 2,516.1 | 100 | 100 | 100 | 86.3 |
| 9min | 41,385 | 46,033,438 | 2,927.2 | 100 | 100 | 100 | 87.7 |
| 10min | 47,147 | 52,498,421 | 3,338.1 | 100 | 100 | 100 | 87.9 |
| 20min | 99,709 | 111,588,941 | 7,092.6 | 100 | 100 | 100 | 93.2 |
| 30min | 151,247 | 169,631,455 | 10,779.6 | 100 | 100 | 100 | 93.3 |
| ... |  |  |  |  |  |  |  |
| 6h | 1,572,533 | 1,784,529,622 | 51,496.3 | 100 | 100 | 100 | 93.4 |
